# Supplementary material for: Intravenous Treatment with a Long-Chain Omega-3 Lipid Emulsion Provides Neuroprotection in a Murine Model of Ischemic Stroke – A Pilot Study
Source: PLOS journal article supplement (doi:10.1371/journal.pone.0167329), 2016-11-30
Supplement: S6 (10.1371/journal.pone.0167329.s006) [file journal.pone.0167329.s006.pdf]

## Supplemental sheet

**S1 Table. List of tasks and scoring for the Neurological Severity Score (NSS).** Succession in the tasks will result in zero points, whilst task failure results in points of 1-3 depending on the task. The maximum score is 16. The higher the score, the worse the neurological outcome.

| <b>Task</b>                  | <b>Description</b>                                                                                                         | <b>Success</b> | <b>Failure</b> |
|------------------------------|----------------------------------------------------------------------------------------------------------------------------|----------------|----------------|
| <b>Exit circle</b>           | Ability and initiative to exit a circle of 30 cm diameter within 3 minutes                                                 | 0              | 1              |
| <b>Mono-/Hemiparesis</b>     | Paresis of upper and/or lower limb of contralateral side                                                                   | 0              | 1              |
| <b>Straight walk</b>         | Alertness, initiative and motor ability to walk straight once the mouse is put on the floor                                | 0              | 1              |
| <b>Startle reflex</b>        | Innate reflex; the mouse will bounce in response to a loud clap of the hands                                               | 0              | 1              |
| <b>Seeking behavior</b>      | Physiological behavior as a sign of interest in the environment                                                            | 0              | 1              |
| <b>Beam balancing</b>        | Ability to balance on a beam stick of 7 mm width for at least 10 seconds                                                   | 0              | 1              |
| <b>Round stick balancing</b> | Ability to balance on a round stick of 5 mm diameter for at least 10 seconds                                               | 0              | 1              |
| <b>Beam walk: 3cm</b>        | Ability to cross a 30cm long beam of 3 cm width                                                                            | 0              | 1              |
| <b>Beam walk: 2cm</b>        | Ability to cross a 30cm long beam of 2 cm width                                                                            | 0              | 1              |
| <b>Beam walk: 1cm</b>        | Ability to cross a 30cm long beam of 1 cm width                                                                            | 0              | 1              |
| <b>Motor test</b>            | Raising the mouse by the tail, flexion of fore- or hind limbs with a head movement <10° to vertical axis within 30 seconds | 0              | 1              |
| <b>Walking test</b>          | Normal walk                                                                                                                | 0              |                |
|                              | Inability to walk straight                                                                                                 | 1              |                |
|                              | Circling towards the paretic side                                                                                          | 2              |                |
|                              | Fall down to the paretic side                                                                                              | 3              |                |
| <b>Pinna reflex</b>          | Head shake when touching the auditory meatus                                                                               | 0              | 1              |
| <b>Chimney test</b>          | Ability to exit a chimney of 20cm length backwards in vertical coordination within 30 seconds                              | 0              | 1              |
